# Supplementary material
Source: publisher figshare collection journal article supplement (https://frontiersin.figshare.com/ndownloader/files/25528301)
Supplement: Supplementary file [file 25528301]

## Supplementary materials for

### Neonatal heart responds to pressure overload with differential alterations in various cardiomyocyte maturation programs that accommodate simultaneous hypertrophy and hyperplasia

Xiaoning Ding<sup>1,\*</sup>, Shoubao Wang<sup>2,3,\*</sup>, Ye Wang<sup>1</sup>, Junjie Yang<sup>1</sup>, Nan Bao<sup>4,#</sup>, Jinfen Liu<sup>2,#</sup>, Zhen Zhang<sup>1,#</sup>

<sup>1</sup>Pediatric Translational Medicine Institute and Shanghai Pediatric Congenital Heart Disease Institute, Shanghai Children's Medical Center, Shanghai Jiao Tong University School of Medicine, Shanghai 200127, China.

<sup>2</sup>Department of Thoracic and Cardiovascular Surgery, Shanghai Children's Medical Center, Shanghai Jiao Tong University School of Medicine, Shanghai 200127, China.

<sup>3</sup>Present address: Department of Plastic and Reconstructive Surgery, Shanghai Ninth People's Hospital, Shanghai Jiao Tong University School of Medicine, Shanghai 200011, China.

<sup>4</sup>Department of Pediatric Surgery, Shanghai Children's Medical Center, Shanghai Jiao Tong University School of Medicine, Shanghai 200127, China.

\*These authors contributed equally.

#Correspondence to: Nan Bao, [bnscmc@shsmu.edu.cn](mailto:bnscmc@shsmu.edu.cn); Jinfen Liu, [liujinfen2002@126.com](mailto:liujinfen2002@126.com); Zhen Zhang, [zhenzhang@sjtu.edu.cn](mailto:zhenzhang@sjtu.edu.cn).

## Supplementary Figure

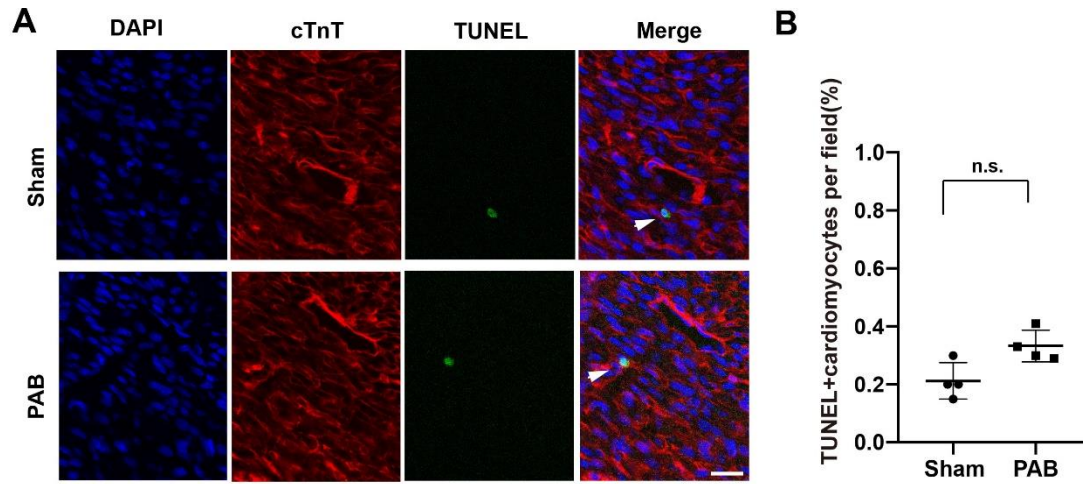

**Figure S1.** Cardiomyocyte apoptosis in P7 PAB hearts. **(A)** Representative confocal images for TUNEL (green), cTnT (red) and DAPI (blue) staining. Arrowheads, apoptotic cardiomyocyte. **(B)** Quantification of TUNEL<sup>+</sup> cardiomyocytes (n=4). Data are presented as Mean ± SEM. Two-tailed Student's t test. n.s, non-significant. Scale bar: 25μm.
